# Supplementary material for: Metabolic Adaptations to Caloric Restriction: Time- and Group-Dependent Metabolomic Signatures from the CALERIE™ Trial
Source: Research Square preprint supplement (doi:10.21203/rs.3.rs-9237764/v1), 2026-03-30
Supplement: Supplementary file 1 [file 8283955d1a7859999568d6d1.docx]

| **Supplemental Table 1.** PCA was performed separately within each super‑pathway, and components were retained based on the scree‑plot elbow and interpretability criteria. This procedure yielded a specific number of retained components for each super‑pathway, creating a streamlined set of pathway‑level features for downstream modeling.   | **Super Pathways** | **No. of metabolites** | **Retained PCs** | | --- | --- | --- | | Amino Acid | 215 | 2 | | Peptides | 36 | 2 | | Carbohydrates | 26 | 4 | | Energy | 9 | 2 | | Lipids | 303 | 4 | | Nucleotides | 36 | 2 | | Cofactors and Vitamins | 40 | 4 | | Xenobiotics | 159 | 5 | | Partially Characterized Molecules | 15 | 5 |   **Supplementary Table 2.** Differences in significant super pathway principal components (PCs) assessed between groups [calorie restriction (CR) and *ad libitum* (AL)]; across time (12M and 24M), and interactions of group by time. | | | |
| --- | --- | --- | --- | --- | --- | --- | --- | --- | --- | --- | --- | --- | --- | --- | --- | --- | --- | --- | --- | --- | --- | --- | --- | --- | --- | --- | --- | --- | --- | --- | --- | --- | --- |
| ***AL vs. CR differences in super pathway PC across 12 and 24 months*** | | | |
| **Superpathway** | **PC #** | **CR effect +/- SE**  **(Factor (group))** | **P-value** |
| Cofactors and Vitamins | 2 | 0.46 ± 0.12 | 0.0002 |
| Carbohydrate | 2 | 0.29 ± 0.08 | 0.0003 |
| Carbohydrate | 3 | 0.36 ± 0.11 | 0.001 |
| Partially Characterized | 5 | -0.44 ± 0.14 | 0.002 |
| Lipid | 3 | -0.27 ± 0.10 | 0.01 |
| Xenobiotics | 1 | 0.45 ± 0.18 | 0.02 |
| Lipid | 2 | -0.17 ± 0.08 | 0.03 |
| Amino Acid | 2 | 0.22 ± 0.11 | 0.04 |
| ***12M and 24M differences in super pathway PC across CR and AL*** | | | |
| **Superpathway** | **PC** | **12M effect +/- SE** | **P-value** |
| Nucleotide | 1 | -1.74 ± 0.72 | 0.02 |
| Nucleotide | 2 | -1.82 ± 0.77 | 0.02 |
| **Superpathway** | **PC** | **24M effect +/- SE** | **P-value** |
| Carbohydrate | 2 | 0.40 ± 0.087 | 0.000006 |
| Peptide | 1 | 0.22 ± 0.098 | 0.024 |
| Cofactors and Vitamins | 1 | -0.19 ± 0.097 | 0.047 |
| ***CR Group by time differences in super pathway PC*** | | | |
| **Superpathway** | **PC** | **CR by time effect +/- SE**  **(CR group x time)** | **P-value** |
| Carbohydrate | 2 | -0.37 ± 0.11 | 0.0007 |
| Partially Characterized | 5 | 0.41 ± 0.15 | 0.009 |
| Lipid | 4 | 0.47 ± 0.23 | 0.04 |

Effects shown are parameter and standard error (SE) when controlling for site, body mass index, sex, and baseline principal component values.

**Supplemental Table 3.** Metabolite contributions to Principal Components (PCs).

| **Pathway and PC metabolites** | **Criteria** |
| --- | --- |
| **Amino acid PC2** |  |
| X2.hydroxybutyrate.2.hydroxyisobutyrate | 4.43 |
| alpha.ketobutyrate | 4.42 |
| glycine | 3.78 |
| xanthurenate | 2.55 |
| X3.methyl.2.oxobutyrate | 2.44 |
| X8.methoxykynurenate | 2.39 |
| X4.methyl.2.oxopentanoate | 2.31 |
| alpha.hydroxyisovalerate | 2.08 |
| X3.methyl.2.oxovalerate | 2.07 |
| glutamine | 2.06 |
| formiminoglutamate | 1.84 |
| citrulline | 1.79 |
| vanillylmandelate..VMA. | 1.76 |
| X6.oxopiperidine.2.carboxylate | 1.71 |
| X3.amino.2.piperidone | 1.58 |
| serine | 1.58 |
| picolinate | 1.57 |
| **Carbohydrate PC2** |  |
| maltotriose | 24.94 |
| maltose | 21.91 |
| maltotetraose | 21.61 |
| N.acetylneuraminate | 13.58 |
| X3.phosphoglycerate | 7.02 |
| xylose | 2.31 |
| arabinose | 2.14 |
| **Carbohydrate PC3** |  |
| pyruvate | 26.74 |
| lactate | 23.22 |
| glycerate | 15.29 |
| N.acetylglucosaminylasparagine | 8.75 |
| mannose | 6.82 |
| erythronate. | 3.96 |
| fructose | 2.42 |
| X3.phosphoglycerate | 2.23 |
| ribitol | 1.97 |
| lyxonate | 1.89 |
| glucuronate | 1.72 |
| **Cofactors and vitamins PC1** |  |
| alpha.CEHC.glucuronide. | 10.31 |
| alpha.CEHC.sulfate | 8.15 |
| gamma.CEHC.glucuronide. | 8.09 |
| gamma.CEHC | 7.03 |
| N1.Methyl.2.pyridone.5.carboxamide | 6.27 |
| alpha.CEHC | 5.88 |
| X2.O.methylascorbic.acid | 5.83 |
| delta.CEHC | 4.89 |
| delta.CEHC.glucuronide | 4.73 |
| alpha.CMBHC.glucuronide | 4.64 |
| pantothenate | 3.59 |
| pyridoxate | 2.98 |
| N1.Methyl.4.pyridone.3.carboxamide | 2.98 |
| retinol..Vitamin.A. | 2.20 |
| gamma.CEHC.sulfate | 2.11 |
| bilirubin..E.Z.or.Z.E.. | 2.03 |
| X1.methylnicotinamide | 1.86 |
| gulonate. | 1.79 |
| alpha.tocopherol | 1.77 |
| retinal | 1.63 |
| **Cofactors and vitamins PC2** |  |
| carotene.diol..1. | 10.48 |
| carotene.diol..2. | 9.22 |
| gamma.CEHC | 7.58 |
| delta.CEHC | 7.53 |
| carotene.diol..3. | 6.80 |
| ascorbic.acid.3.sulfate. | 4.99 |
| gamma.CEHC.glucuronide. | 4.79 |
| retinol..Vitamin.A. | 4.71 |
| ascorbic.acid.2.sulfate | 3.83 |
| delta.CEHC.glucuronide | 2.68 |
| pantothenate | 2.59 |
| alpha.CEHC | 2.57 |
| bilirubin..Z.Z. | 2.53 |
| retinal | 2.50 |
| alpha.tocopherol | 2.47 |
| alpha.CEHC.sulfate | 2.31 |
| flavin.adenine.dinucleotide..FAD. | 2.24 |
| biliverdin | 2.12 |
| bilirubin..E.Z.or.Z.E.. | 1.87 |
| beta.cryptoxanthin | 1.74 |
| **Lipid PC2** |  |
| pregnenetriol.sulfate. | 2.23 |
| androstenediol..3beta.17beta..monosulfate..1. | 2.10 |
| androstenediol..3beta.17beta..disulfate..2. | 2.00 |
| dehydroepiandrosterone.sulfate..DHEA.S. | 1.97 |
| androstenediol..3alpha..17alpha..monosulfate..2. | 1.88 |
| pregnenediol.sulfate..C21H34O5S.. | 1.90 |
| arachidonoylcarnitine..C20.4. | 1.70 |
| X5alpha.androstan.3beta.17beta.diol.monosulfate..2. | 1.63 |
| X11beta.hydroxyandrosterone.glucuronide | 1.62 |
| X5alpha.androstan.3alpha.17beta.diol.17.glucuronide | 1.58 |
| X21.hydroxypregnenolone.disulfate | 1.56 |
| **Lipid PC3** |  |
| glycerophosphoethanolamine | 2.28 |
| X1.stearoyl.2.oleoyl.GPS..18.0.18.1. | 1.75 |
| X1.stearoyl.GPS..18.0.. | 1.75 |
| sphingosine.1.phosphate | 1.68 |
| sphinganine.1.phosphate | 1.65 |
| octadecenedioylcarnitine..C18.1.DC.. | 1.62 |
| **Lipid PC4** |  |
| sphinganine | 2.51 |
| sphingosine.1.phosphate | 1.91 |
| sphingosine | 1.80 |
| sphinganine.1.phosphate | 1.77 |
| **Nucleotide PC1** |  |
| pseudouridine | 7.87 |
| N6.carbamoylthreonyladenosine | 7.47 |
| N2.N2.dimethylguanosine | 7.12 |
| X7.methylguanine | 6.78 |
| X3..3.amino.3.carboxypropyl.uridine. | 6.50 |
| N1.methyladenosine | 6.38 |
| X5.methyluridine..ribothymidine. | 4.98 |
| allantoin | 4.59 |
| urate | 4.53 |
| X5.6.dihydrothymine | 4.51 |
| X5.6.dihydrouridine | 3.98 |
| orotidine | 3.42 |
| N1.methylinosine | 3.41 |
| N.acetyl.beta.alanine | 3.25 |
| uridine | 2.88 |
| xanthosine | 2.70 |
| beta.alanine | 2.17 |
| N6.succinyladenosine | 2.02 |
| X2..O.methylcytidine | 1.96 |
| X2..O.methyluridine | 1.91 |
| **Nucleotide PC2** |  |
| adenosine.5..monophosphate..AMP. | 12.82 |
| hypoxanthine | 10.62 |
| inosine | 10.30 |
| inosine.5..monophosphate..IMP. | 9.46 |
| dihydroorotate | 9.13 |
| xanthine | 8.21 |
| cytidine | 5.50 |
| X2..deoxyuridine | 4.06 |
| N4.acetylcytidine | 3.98 |
| orotate | 3.97 |
| uracil | 3.18 |
| beta.alanine | 3.04 |
| X5.6.dihydrouridine | 2.37 |
| **Partially Characterized Molecules PC5** |  |
| glutamine_degradant. | 30.62 |
| pentose.acid. | 30.46 |
| branched.chain..straight.chain..or.cyclopropyl.10.1.fatty.acid..3.. | 13.79 |
| metabolonic.lactone.sulfate | 12.92 |
| branched.chain..straight.chain..or.cyclopropyl.12.1.fatty.acid. | 4.06 |
| glycine.conjugate.of.C10H14O2..1.. | 3.01 |
| **Peptide PC1** |  |
| gamma.glutamylleucine | 7.59 |
| gamma.glutamylmethionine | 7.45 |
| gamma.glutamylvaline | 7.33 |
| gamma.glutamylglutamate | 7.30 |
| gamma.glutamylisoleucine. | 7.24 |
| gamma.glutamyl.alpha.lysine | 7.07 |
| gamma.glutamylglycine | 6.59 |
| gamma.glutamyl.2.aminobutyrate | 6.14 |
| gamma.glutamylphenylalanine | 5.75 |
| gamma.glutamylglutamine | 5.04 |
| gamma.glutamylthreonine | 5.00 |
| gamma.glutamylalanine | 4.65 |
| gamma.glutamylhistidine | 3.40 |
| HWESASXX. | 3.31 |
| gamma.glutamyltyrosine | 3.19 |
| gamma.glutamylcitrulline. | 3.07 |
| gamma.glutamyl.epsilon.lysine | 2.26 |
| valylglycine | 2.01 |
| gamma.glutamyltryptophan | 1.60 |
| isoleucylglycine | 1.50 |
| **Xenobiotics PC1** |  |
| X5.acetylamino.6.amino.3.methyluracil | 4.34 |
| X1.methylxanthine | 4.04 |
| X1.methylurate | 4.03 |
| X1.3.dimethylurate | 4.03 |
| X1.7.dimethylurate | 4.02 |
| X3.hydroxypyridine.sulfate | 3.84 |
| paraxanthine | 3.63 |
| quinate | 3.45 |
| catechol.sulfate | 3.30 |
| theophylline | 3.20 |
| X3.methoxycatechol.sulfate..2. | 3.00 |
| N..2.furoyl.glycine | 2.89 |
| guaiacol.sulfate | 2.74 |
| X2.aminophenol.sulfate | 2.51 |
| X2.acetamidophenol.sulfate | 2.46 |
| X3.methylxanthine | 2.34 |
| X7.methylxanthine | 2.16 |
| X3.7.dimethylurate | 2.02 |
| hippurate | 1.82 |
| X1.3.7.trimethylurate | 1.78 |
| caffeine | 1.63 |
| X3.methyl.catechol.sulfate..1. | 1.55 |
| X5.acetylamino.6.formylamino.3.methyluracil | 1.55 |

Metabolites in each superpathway underwent principal component (PC) analysis with retention of PC number according to scree plots, as outlined in the Methods Section. For each PC, the ‘Criteria’ is defined as the loadings (or variance explained) for each metabolite. Metabolites with the greatest loadings (i.e. contributed the most to variance explained for each PC), using the criteria of >2%, were considered key PC constituents.
